# Supplementary material for: Pre-clinical validation of a pan-cancer CAR-T cell immunotherapy targeting nfP2X7
Source: Nat Commun. 2023 Sep 8;14:5546. doi: 10.1038/s41467-023-41338-y (PMC10491676; doi:10.1038/s41467-023-41338-y)
Supplement: Supplementary file 1 — Supplementary Information [file 41467_2023_41338_MOESM1_ESM.pdf]

# Pre-clinical validation of a pan-cancer CAR-T cell immunotherapy targeting nfP2X7.

## Supplementary information

V. Bandara<sup>1\*</sup>, J. Foeng<sup>2\*</sup>, B. Gundsambuu<sup>1</sup>, T.S. Norton<sup>2</sup>, S. Napoli<sup>1</sup>, D.J. McPeake<sup>2</sup>, T.S. Tyllis<sup>2</sup>, E. Rohani-Rad<sup>2</sup>, C. Abbott<sup>2</sup>, S.J. Mills<sup>3</sup>, L.Y. Tan<sup>4</sup>, E.J. Thompson<sup>4</sup>, V.J. Willet<sup>5</sup>, V.M. Nikitaras<sup>5</sup>, J. Zheng<sup>1</sup>, I. Comerford<sup>2</sup>, A. Johnson<sup>6</sup>, J. Coombs<sup>7</sup>, M.K. Oehler<sup>8</sup>, C. Ricciardelli<sup>5</sup>, A.J. Cowin<sup>3</sup>, C.S. Bonder<sup>4,9</sup>, M. Jensen<sup>6</sup>, T.J. Sadlon<sup>10</sup>, S.R. McColl<sup>2,7\*</sup>, S.C. Barry<sup>1,7,10\*#</sup>

1 Molecular Immunology RRI University of Adelaide, Adelaide, SA 5000, Australia

2 Chemokine Biology Laboratory, Department of Molecular and Cellular Biology, School of Biological Sciences, University of Adelaide, Adelaide, SA 5005, Australia

3 University of South Australia, STEM (Future Industries Institute) SA, 5095, Australia

4 Centre for Cancer Biology, University of South Australia and SA Pathology, Adelaide, SA 5001, Australia

5 Reproductive Cancer Research group, Discipline Obstetrics and Gynaecology, Robinson Research Institute, University of Adelaide, SA 5005, Australia

6 Seattle Children's Research Institute, WA 98101, United States

7 Carina Biotech, Level 2 Innovation & Collaboration Centre, UniSA Bradley Building, Adelaide SA 5001, Australia

8 Department of Gynaecological Oncology, Royal Adelaide Hospital, SA 5005, Australia

9 Adelaide Medical School, The University of Adelaide, Adelaide, SA 5005, Australia

10 Department of Gastroenterology, Women's and Children's Health Network, North Adelaide, SA 5006, Australia.

\*These authors contributed equally

#corresponding Author: [simon.barry@adelaide.edu.au](mailto:simon.barry@adelaide.edu.au)

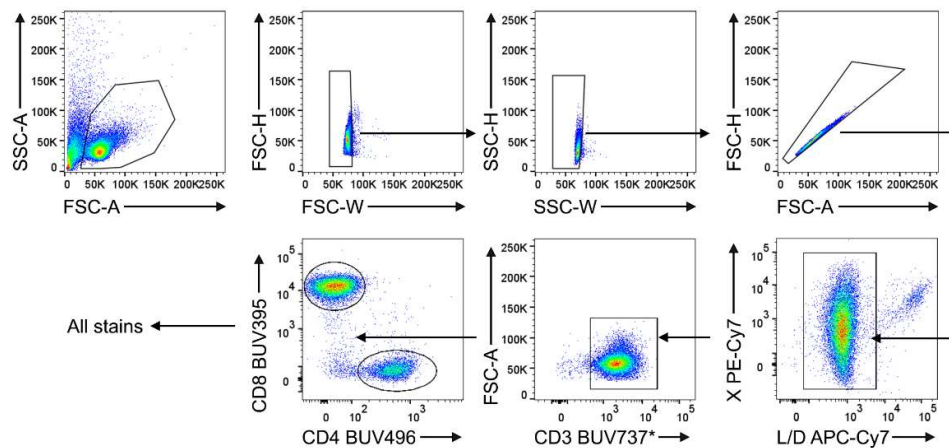

**Supplementary Figure 1: Flow cytometry pre-gating strategy for all stains.** Lymphocyte gating, single cell discrimination, viability gating, CD3<sup>+</sup> gating, CD4<sup>+</sup> or CD8<sup>+</sup> gating serves as a pre-gate for all flow cytometry data, with the exception of the activation marker phenotyping. \*In that panel, CD28-BUV737 was used such that the combination of fluorophores was optimised to reduce spectral spill over. As CD3 was conjugated to the same fluorophore and cells were routinely all CD3<sup>+</sup>, it was not included in the panel. Gating strategy was used for Figures 4b-d and 5b-d. X represents CD95, CD45RO, PD-1 or CD107a. L/D, live/dead viability dye.

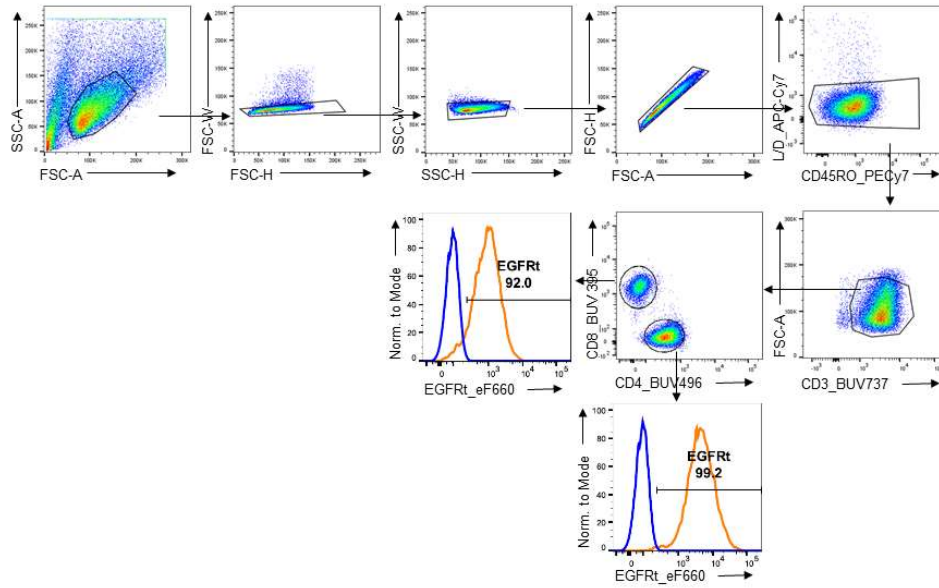

**Supplementary Figure 2: Flow cytometry gating strategy for CAR expression.** After setting pre-gates depicted in Supplementary Figure 1, CD4<sup>+</sup> and CD8<sup>+</sup> T cells were gated for EGFR. Gating strategy was used for Figure 1b and 2a.

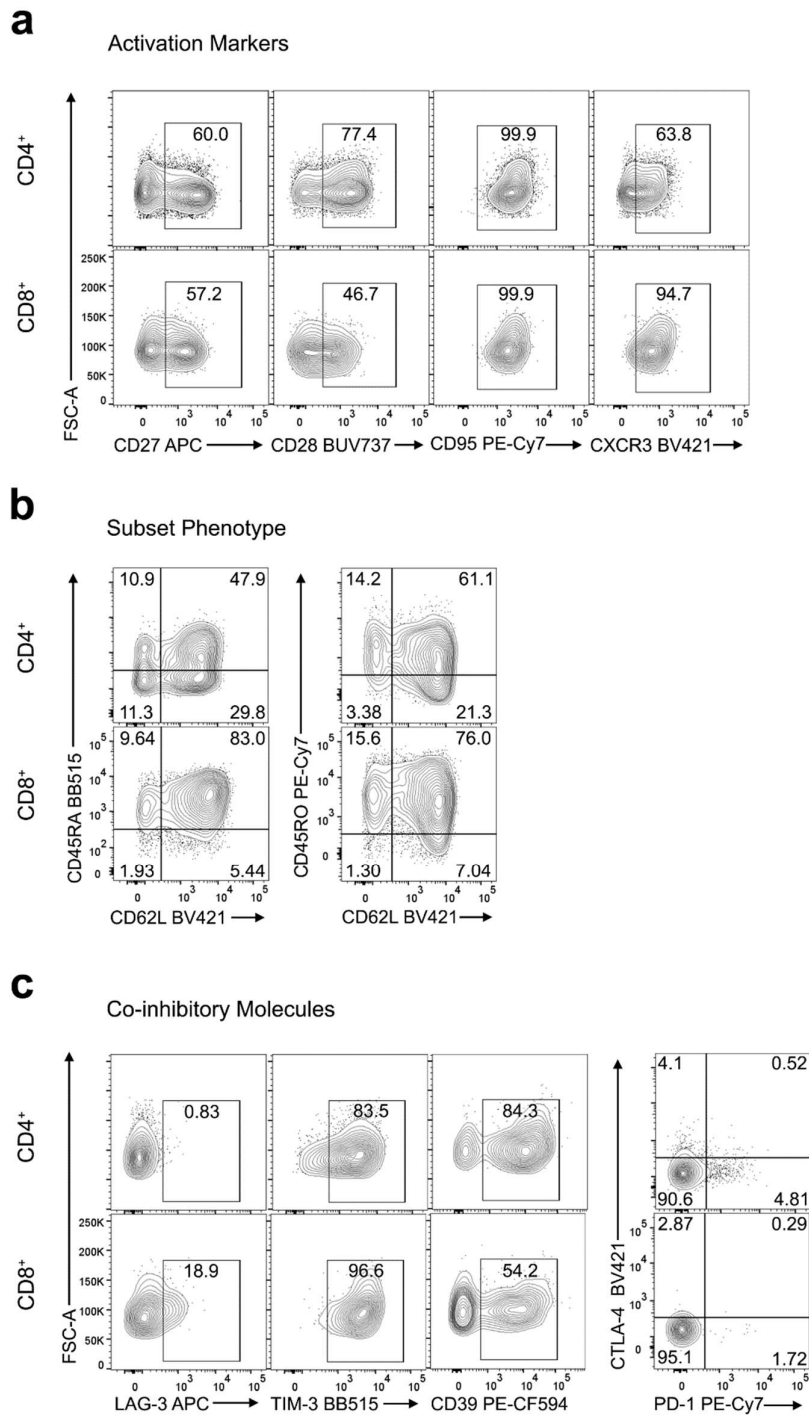

**Supplementary Figure 3: Flow cytometry gating strategy for T cell phenotype.** After setting pre-gates depicted in Supplementary Figure 1, CD4<sup>+</sup> and CD8<sup>+</sup> T cells were gated for (a) activation marker expression, (b) subset phenotype and (c) co-inhibitory molecule expression. Gates were set on fluorescence minus one (FMO) controls, with the exception of CTLA-4, which was gated based on an FMO for cultured T cells or an isotype control for tumour suspensions. Gating strategy was used for Figures 6c-d and 7c-d.

**a****Activation Markers**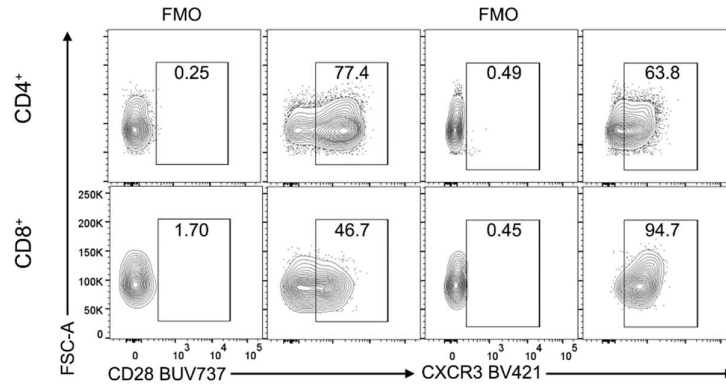**b****Co-inhibitory Molecules**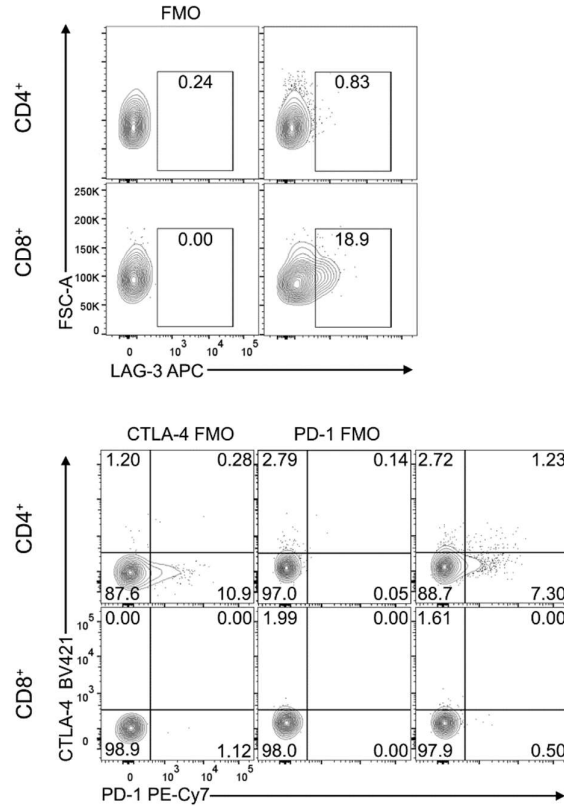

**Supplementary Figure 4: Flow cytometry gating strategy for T cell phenotype (FMOs).** After setting pre-gates depicted in Supplementary Figure 1, CD4<sup>+</sup> and CD8<sup>+</sup> T cells were gated for **(a)** activation marker expression and **(b)** co-inhibitory molecule expression. FMO controls are shown alongside stained samples. Gating strategy was used for Figures 4c-d and 5c-d. FMO, fluorescence minus one.

**a**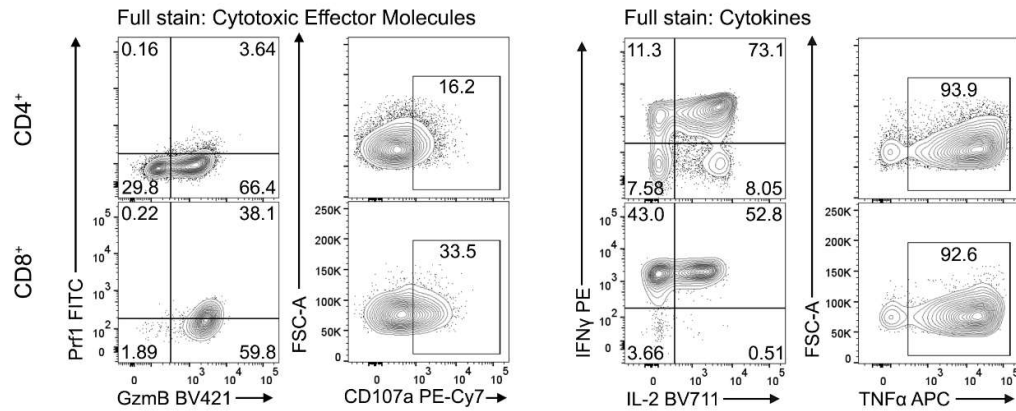**b**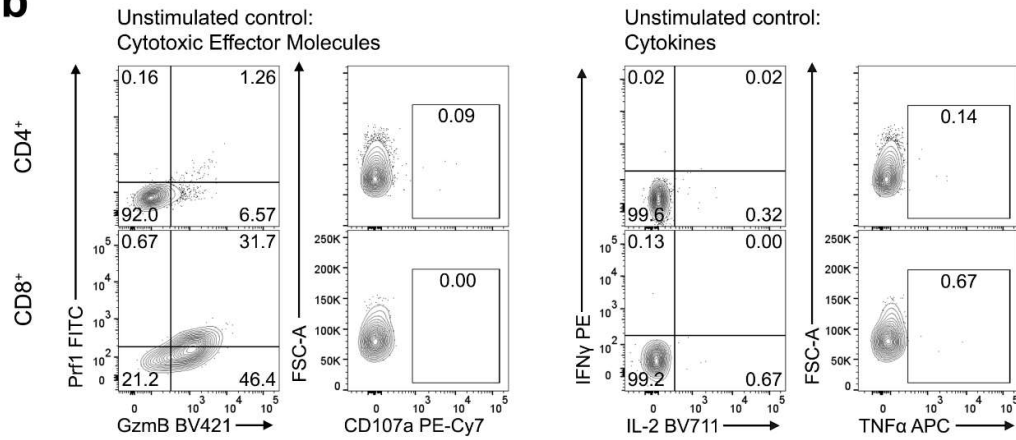**c**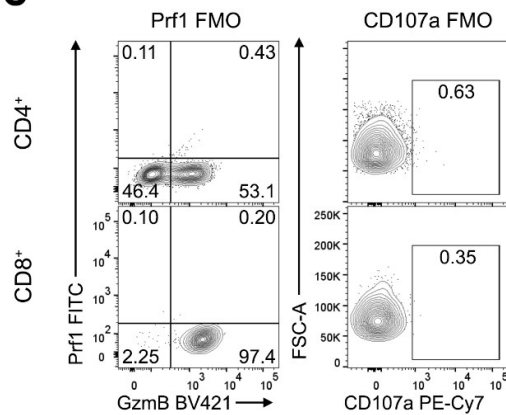

**Supplementary Figure 5: Flow cytometry gating strategy for cytotoxic molecule and cytokine expression.** After setting pre-gates depicted in Supplementary Figure 1, **(a)** CD4<sup>+</sup> and CD8<sup>+</sup> T cells were gated for cytotoxic molecule and cytokine expression. Gates were set on a **(b)** unstimulated control and **(c)** FMO controls. GzmB, granzyme B; Prf1, perforin; FMO, fluorescence minus one.

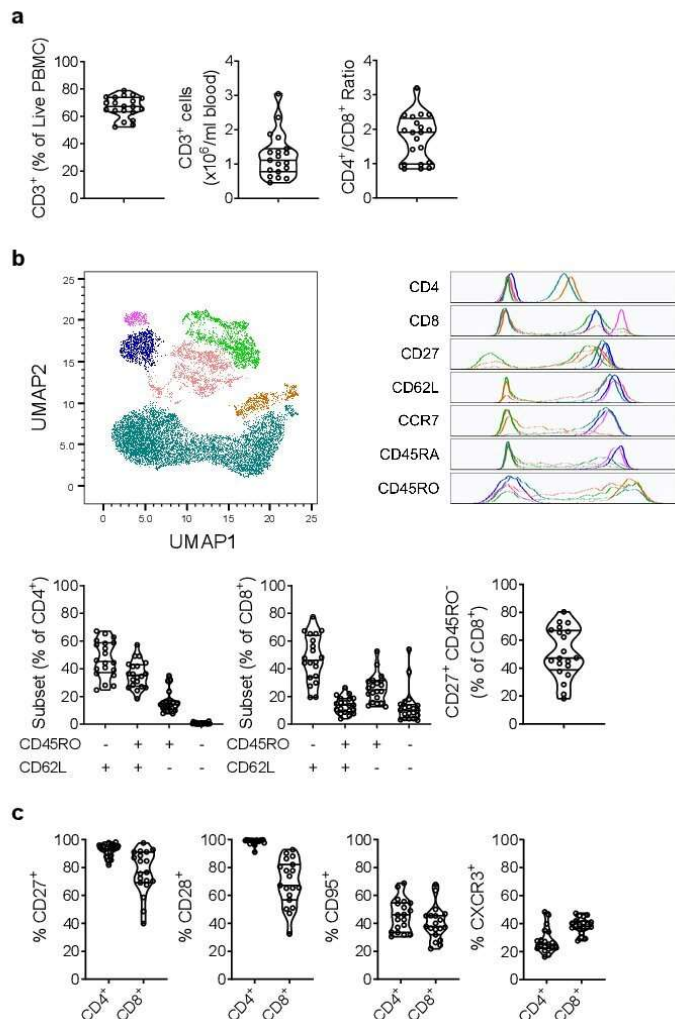

### Supplementary Figure 6: Phenotyping of peripheral blood T cells isolated from healthy donors.

PBMCs were isolated from the fresh peripheral blood of healthy individuals and were assessed for differentiation and activation marker expression by flow cytometry. **(a)** Frequency of CD3<sup>+</sup> cells of total live PBMC (n = 20), number of CD3<sup>+</sup> cells per ml of blood (n = 19) and CD4<sup>+</sup>/CD8<sup>+</sup> ratio of CD3<sup>+</sup> (n = 20). **(b)** UMAP analysis of differentiation/activation marker expression by CD3<sup>+</sup> cells, represented as two-dimensional clusters and histogram overlays of individual clusters; n = 20. Frequencies of T cell subset phenotypes of CD4<sup>+</sup> and CD8<sup>+</sup> and frequency of CD27<sup>+</sup> CD45RO<sup>-</sup> of CD8<sup>+</sup>; n = 20. **(c)** Frequencies of activation markers, CD27, CD28, CD95 and CXCR3 of CD4<sup>+</sup> and CD8<sup>+</sup>; n = 19. Gating strategy is shown in Supplementary Figures 1-3. Data pooled from 20 donors across three independent experiments and represented as mean ± SEM. PBMC, peripheral blood mononuclear cells; UMAP, uniform manifold approximation and projection.

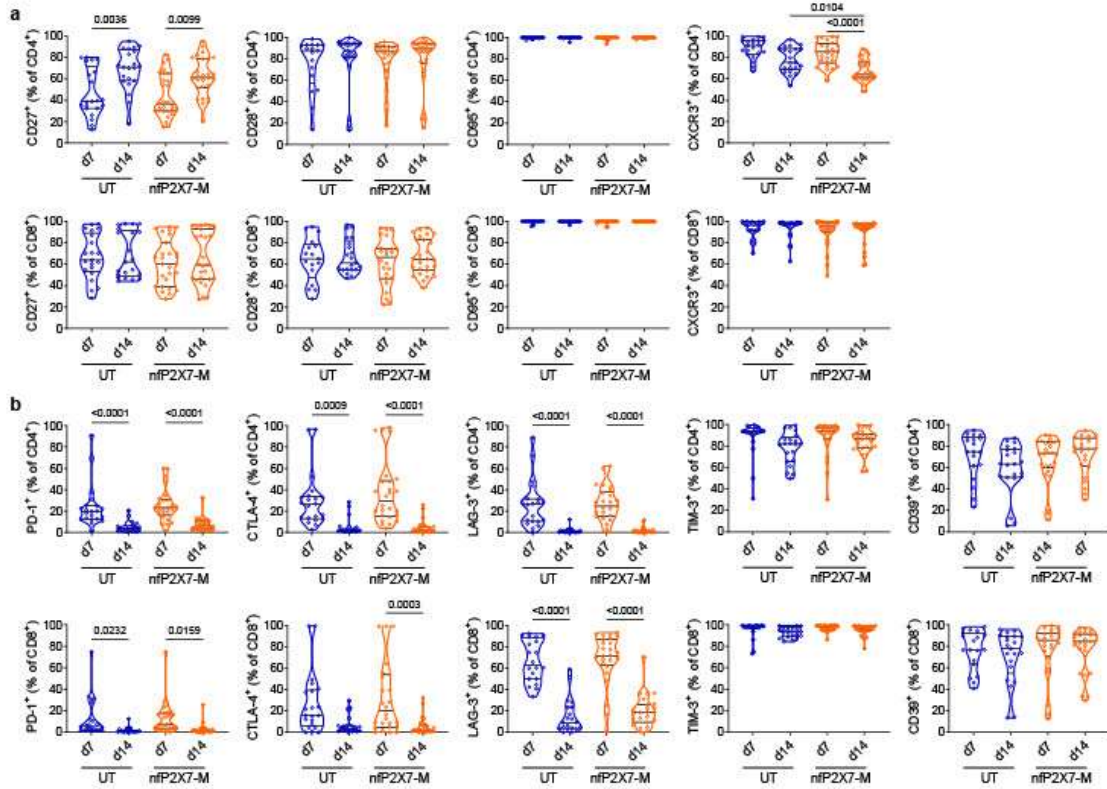

**Supplementary Figure 7: NfP2X7-targeting CAR-T cells are highly activated and display minimal co-inhibitory molecule expression.** NfP2X7-targeting CAR-T cells were generated and stimulated with  $\alpha$ -CD3,  $\alpha$ -CD28 and irradiated PBMC. **(a)** Frequency of CD27, CD28, CD95 and CXCR3 of CD4<sup>+</sup> and CD8<sup>+</sup> on d7 post-PBMC and d14 post-PBMC; n = at least 17 (UT d7), n = 21 (UT d14), n = at least 24 (nfP2X7-M d7), n = 27 (nfP2X7-M d14). **(b)** Frequency of PD-1, CTLA-4, LAG-3, TIM-3 and CD39 of CD4<sup>+</sup> and CD8<sup>+</sup> on d7 post-PBMC and d14 post-PBMC; n = at least 19 (UT d7), n = at least 20 (UT d14), n = at least 23 (nfP2X7-M d7), n = at least 25 (nfP2X7-M d14). Gating strategy is shown in Supplementary Figures 1-3. Data pooled from 10 independent CAR-T cell preparations, derived from 8 healthy donors. Data represented as mean  $\pm$  SEM; Ordinary one-way ANOVA with Bonferroni's post-test.

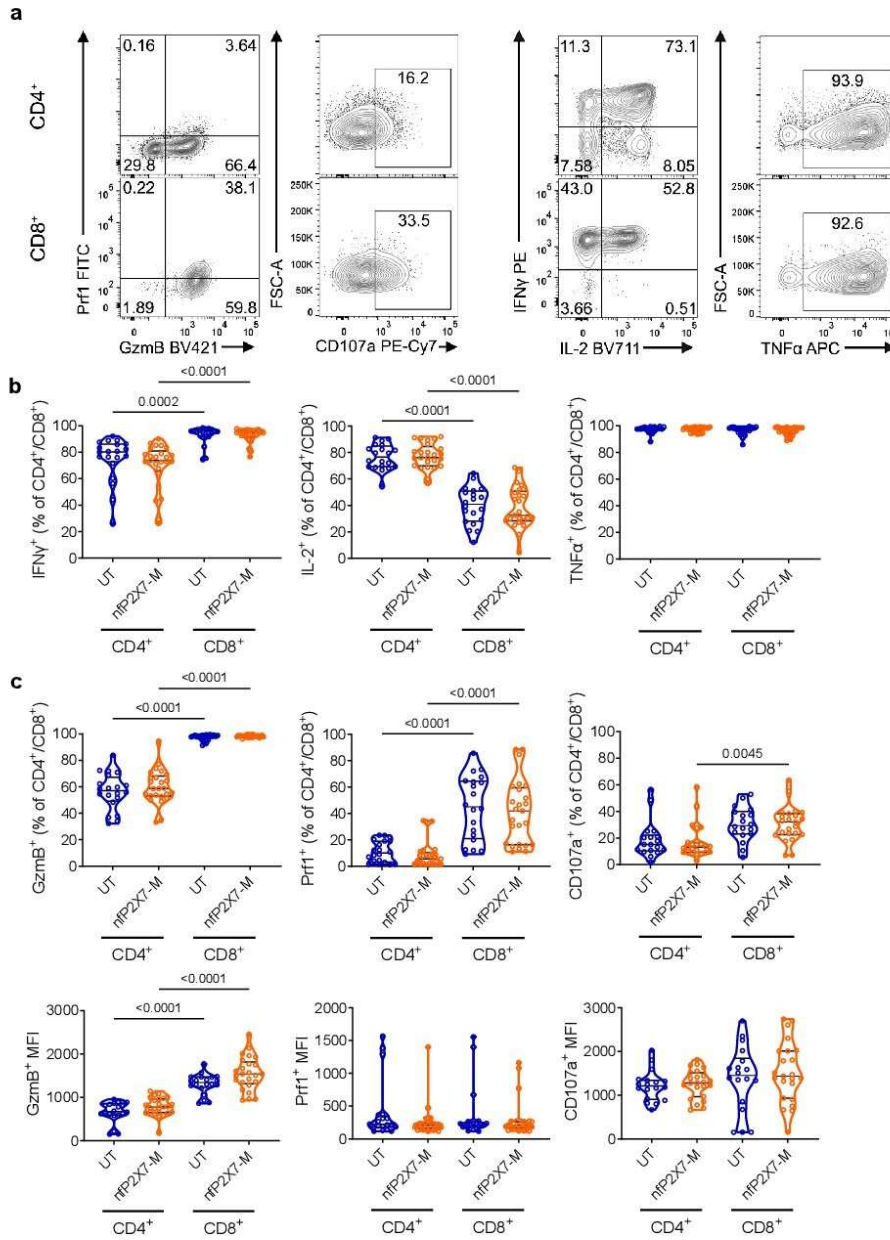

**Supplementary Figure 8: Nfp2X7-targeting CAR-T cells express cytotoxic molecules and T<sub>H</sub>1 cytokines.** Nfp2X7-targeting CAR-T cells were generated and stimulated with  $\alpha$ -CD3,  $\alpha$ -CD28 and irradiated PBMC. On d14 post-PBMC, cells were assessed by flow cytometry following PMA stimulation. **(a)** Representative flow cytometry on d14 post-PBMC. **(b)** Frequency of cytokine expression of CD4<sup>+</sup> and CD8<sup>+</sup>; n = 20 (UT), n = 25 (nfp2X7-M). **(c)** Frequency and geometric fluorescence intensity (gMFI) of granzyme B, perforin and CD107a expression of CD4<sup>+</sup> and CD8<sup>+</sup>; n = at least 18 (UT), n = at least 23 (nfp2X7-M). Gating strategy is shown in Supplementary Figures 1 and 4. Data pooled from 10 independent CAR-T cell preparations, derived from 8 healthy donors. Data represented as mean  $\pm$  SEM; Ordinary one-way ANOVA with Bonferroni's post-test. GzmB, granzyme B; Prf1, perforin; PMA, phorbol 12-myristate 13-acetate.

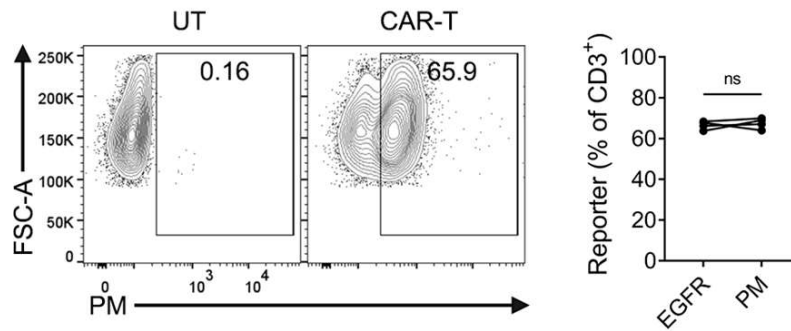

**Supplementary Figure 9: EGFRt reporter expression is a reliable measure of CAR expression.** Frozen nfP2X7-M CAR-T cells were thawed and rested in IL-2 and IL-15 for 2-3 days. (a) Representative flow cytometry and (b) frequency of CAR<sup>+</sup> cells, based on EGFR expression and nfP2X7 peptide mimetic staining of the same cell population, pre-gated on CD3<sup>+</sup>; n = 4; two-tailed paired *t*-test. Data in (b) pooled from four independent experiments. PM, peptide mimetic; SA, streptavidin; ns, non-significant.

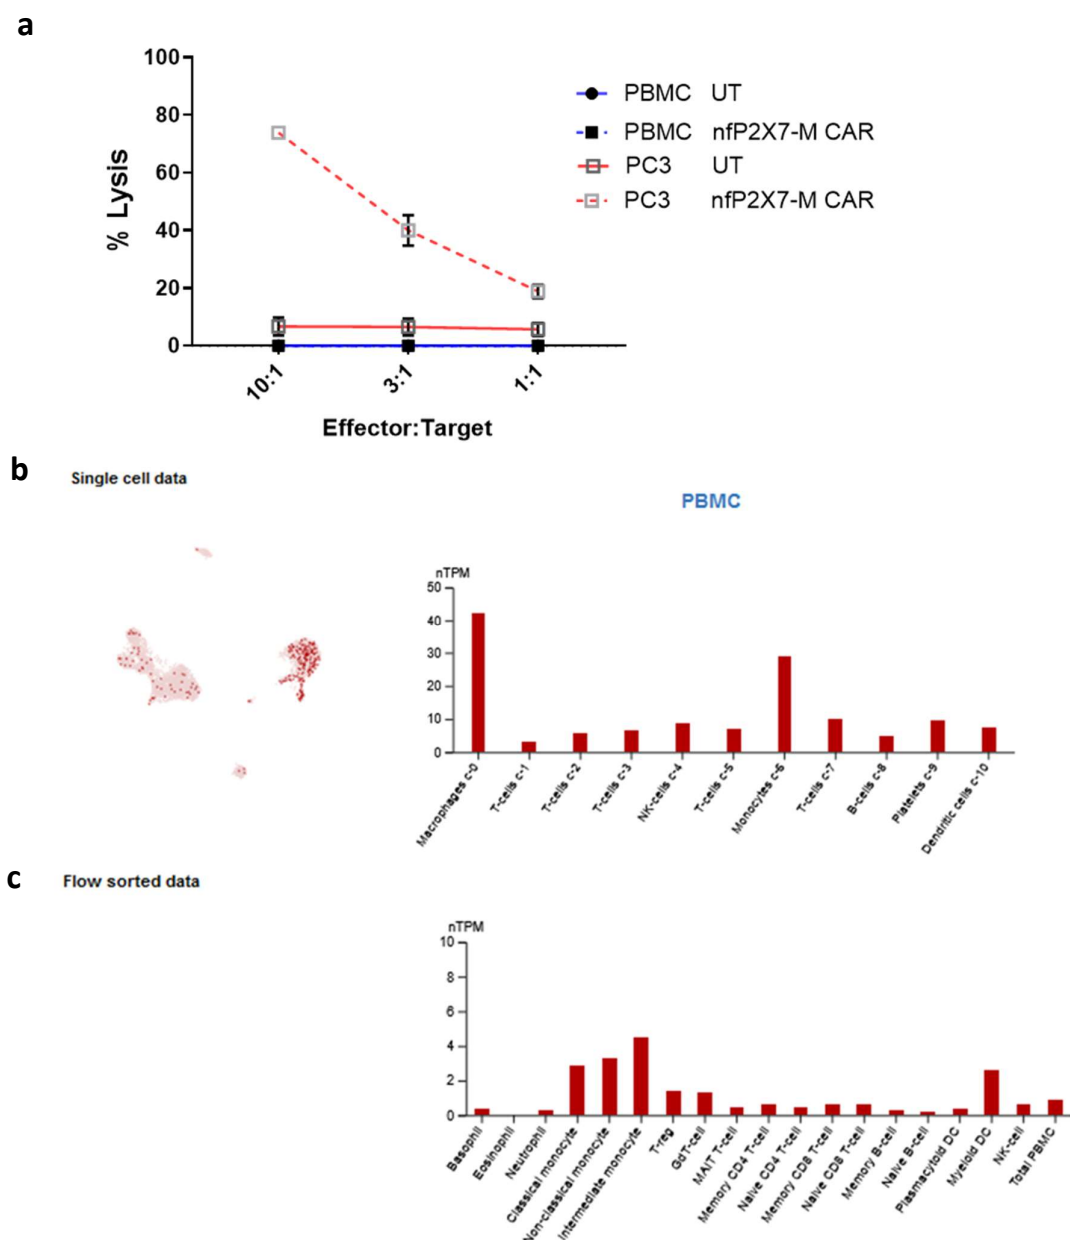

**Supplementary Figure 10: NfP2X7-targeting CAR-T cells do not exhibit cytotoxicity against WT P2X7 expressed by PBMC populations.** (a) To demonstrate that nfP2X7-M CAR-T cells were not cytotoxic towards WT P2X7-positive healthy donor-derived normal cells, nfP2X7-M CAR-T cells or untransduced (UT) donor-matched control cells were co-cultured with healthy donor-derived PBMCs at effector:target ratios of 10:1, 3:1 and 1:1 for 18 h. As a positive control, nfP2X7-M CAR-T cells and donor-matched UT control cells were co-cultured with PC3 prostate cancer cells. Specific cytotoxicity was measured using a BrightGlo luciferase-based cytotoxicity assay system. Data from an experiment testing three independent CAR-T cell preparations prepared from three donors. Gene expression datasets sourced from the Human Protein Atlas database (<https://theproteinatlas.com>) were analysed for expression of P2X7 RNA on (b) single cells from a PBMC scRNAseq dataset, with cluster map and (c) different FACS-sorted cell populations of PBMCs.

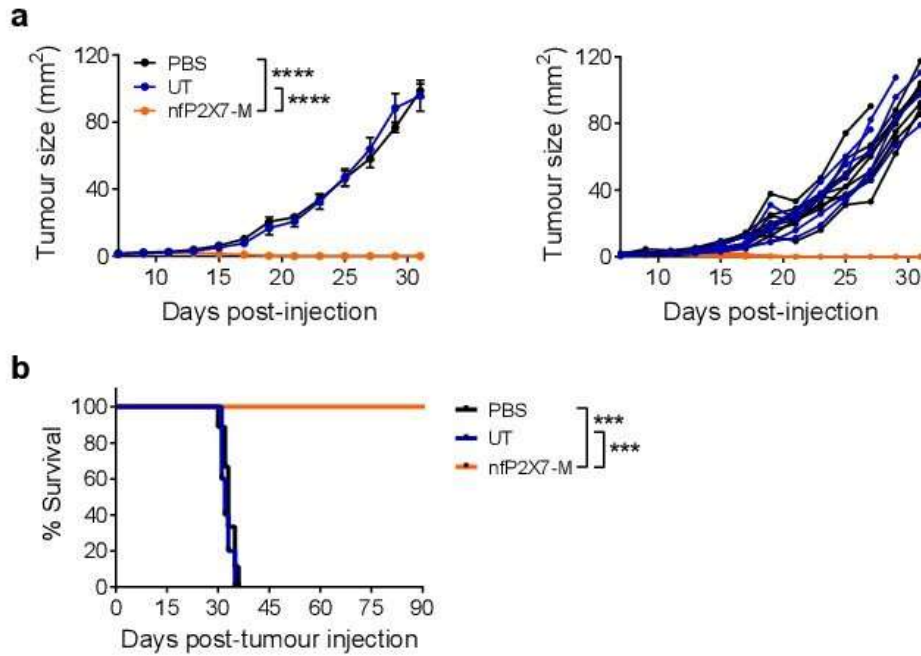

**Supplementary Figure11:** 6-7 week old male NOD-*scid* IL2R $\gamma^{\text{null}}$  (NSG) mice were subcutaneously injected with  $1 \times 10^6$  PC3 human prostate cancer cells into the lower abdomen and intravenously injected with  $2 \times 10^7$  nfP2X7-targeting CAR-T cells or untransduced T cells on d3 post-tumour injection. **(a)** Tumour growth curves as pooled and individual mice; two-way ANOVA with Bonferroni's post-test, \*\*\*\*  $p < 0.0001$ . **(b)** Kaplan-Meier survival curve; Mantel-Cox test, \*\*\*  $p = 0.0009$ . Data from a single experiment and represented as mean  $\pm$  SEM;  $n = 5$  (UT),  $n = 5$  (nfP2X7-M).

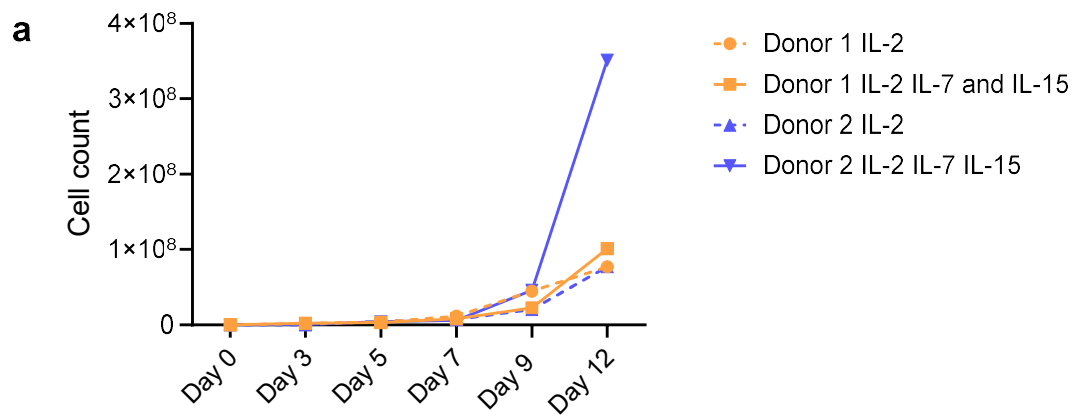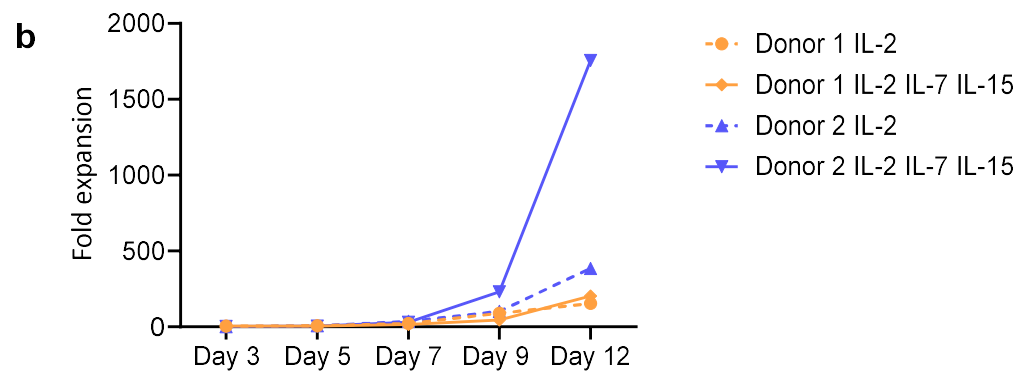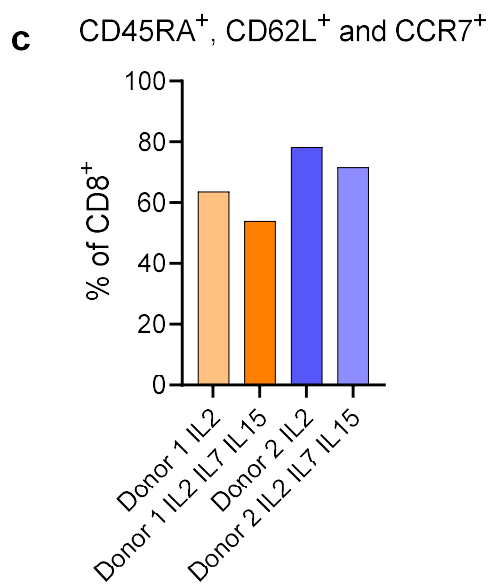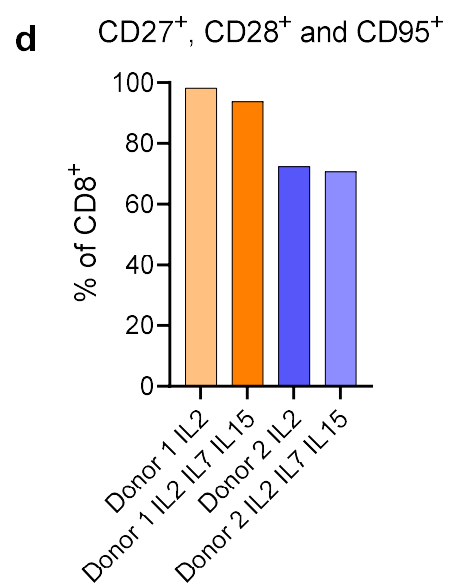

**Supplementary Figure 12: Enhanced CAR-T cell growth using IL-2, IL-7 and IL-15.** NfP2X7 targeting CAR-T cells generated from two donors were cultured in media supplemented with IL-2 only or a combination of IL-2, IL-7 and IL-15. **a)** Comparison of nfP2X7 targeting CAR-T cell numbers over a 12 day expansion, cultured in IL-2 only or a combination of IL-2, IL-7 and IL-15 **b)** Comparison of nfP2X7 targeting CAR-T cell fold expansion over a 12 day expansion, cultured in IL-2 only or a combination of IL-2, IL-7 and IL-15. **c)** Percentage of cells positive for CD45RA<sup>+</sup>, CD62L<sup>+</sup> and CCR7<sup>+</sup> at the end of the 12 day expansion, cultured in IL-2 only or a combination of IL-2, IL-7 and IL-15. **d)** Percentage of cells positive for CD27<sup>+</sup>, CD28<sup>+</sup> and CD95<sup>+</sup> at the end of the 12 day expansion, cultured in IL-2 only or a combination of IL-2, IL-7 and IL-15.

**Supplementary Table 1** Details of cancer cell lines used in this study

| Cell line name | Cancer type    | Media                                                                                                                                          | Obtained from                                                                                                                                                                                           |
|----------------|----------------|------------------------------------------------------------------------------------------------------------------------------------------------|---------------------------------------------------------------------------------------------------------------------------------------------------------------------------------------------------------|
| PC9            | Adenocarcinoma | RPMI 1640 media (Sigma Aldrich) supplemented with 2mM L- glutamine (Gibco) and 10% foetal bovine serum (Scientifix)                            | CellBank Australia, the European Collection of Cell Cultures                                                                                                                                            |
| K562,          | Leukemia       | RPMI 1640 media (Sigma Aldrich) supplemented with 10% foetal bovine serum (Scientifix)                                                         | American Type Culture Collection                                                                                                                                                                        |
| K562-OKT3      | Leukemia       | RPMI 1640 media (Sigma Aldrich) supplemented with 10% foetal bovine serum (Scientifix)                                                         | Kindly provided by Prof Michale Jensen (Seattle Children's Research Institute, Seattle).                                                                                                                |
| K562-Luc       | Leukemia       | RPMI 1640 media (Sigma Aldrich) supplemented with 10% foetal bovine serum (Scientifix)                                                         | CellBank Australia, Japanese Collection of Research Bioresources Cell Bank                                                                                                                              |
| MDA-MB-231     | Breast         | DMEM media (Sigma Aldrich) supplemented with 10% foetal bovine serum (Scientifix)                                                              | The human triple negative breast adenocarcinoma MDA-MB-231 cell line used in <i>in vivo</i> experiments was kindly provided by Prof Robin Anderson (Olivia Newton-John Cancer Research Institute, VIC). |
| MDA-MB-231-Luc | Breast         | DMEM media (Sigma Aldrich) supplemented with 10% foetal bovine serum (Scientifix)                                                              | CellBank Australia, Japanese Collection of Research Bioresources Cell Bank                                                                                                                              |
| MDA-MB-231-LM2 | Breast         | DMEM media (Sigma Aldrich) supplemented with 10% foetal bovine serum (Scientifix)                                                              | Gifted from J Massague, Sloan Kettering Institute                                                                                                                                                       |
| BT-549-Luc     | Breast         | RPMI 1640 media (Sigma Aldrich) supplemented with 10% foetal bovine serum (Scientifix) and 0.023IU Insulin (Protaphone)                        | CellBank Australia, Japanese Collection of Research Bioresources Cell Bank                                                                                                                              |
| HCT-116        | Colorectal     | DMEM media (Sigma Aldrich) supplemented with 2 mM L- glutamine (Gibco) and 10% foetal bovine serum (Scientifix)                                | CellBank Australia, the European Collection of Cell Cultures                                                                                                                                            |
| Lim-1215       | Colorectal     | RPMI 1640 media (Sigma Aldrich) supplemented with 2mM L- glutamine (Gibco), 10% foetal bovine serum (Scientifix), 25mM Hepes, 0.6mg/mL Insulin | CellBank Australia                                                                                                                                                                                      |

|              |                                  |                                                                                                                                |                                                                            |
|--------------|----------------------------------|--------------------------------------------------------------------------------------------------------------------------------|----------------------------------------------------------------------------|
|              |                                  | (Protaphone), 1mg/mL Hydrocortisone (Sigma) and 10mM 1-Thioglycerol (Merck)                                                    |                                                                            |
| LOVO         | Colorectal                       | Ham's F12 media (Sigma Aldrich) supplemented with 10% foetal bovine serum (Scientifix)                                         | European Collection of Cell Cultures, purchased from CellBank Australia    |
| U87          | Glioma                           | EMEM (EBSS) + 2mM Glutamine + 1% Non-Essential Amino Acids (NEAA) + 1mM Sodium Pyruvate (NaP) + 10% Foetal Bovine Serum (FBS). | American Type Culture Collection                                           |
| UM-SCC-1     | Head and neck squamous carcinoma | RPMI 1640 media (Sigma Aldrich) supplemented with 10% foetal bovine serum (Scientifix)                                         | American Type Culture Collection                                           |
| NCI-H460-Luc | Lung                             | RPMI 1640 media (Sigma Aldrich) supplemented with 10% foetal bovine serum (Scientifix)                                         | CellBank Australia, Japanese Collection of Research Bioresources Cell Bank |
| Namalwa      | Lymphoma                         | RPMI 1640 media (Sigma Aldrich) supplemented with 2mM L-glutamine (Gibco) and 10% foetal bovine serum (Scientifix)             | CellBank Australia, the European Collection of Cell Cultures               |
| Raji         | Lymphoma                         | RPMI 1640 media (Sigma Aldrich) supplemented with 2mM L-glutamine (Gibco) and 10% foetal bovine serum (Scientifix)             | CellBank Australia, the European Collection of Cell Cultures               |
| Ramos        | Lymphoma                         | RPMI 1640 media (Sigma Aldrich) supplemented with 2mM L-glutamine (Gibco) and 10% foetal bovine serum (Scientifix)             | CellBank Australia, the European Collection of Cell Cultures               |
| C32          | Melanoma                         | RPMI 1640 media (Sigma Aldrich) supplemented with 10% foetal bovine serum (Scientifix)                                         | American Type Culture Collection                                           |
| M21          | Melanoma                         |                                                                                                                                | American Type Culture Collection                                           |
| Skmel-5      | Melanoma                         | RPMI 1640 media (Sigma Aldrich) supplemented with 10% foetal bovine serum (Scientifix)                                         | American Type Culture Collection                                           |
| Skmel-28     | Melanoma                         | RPMI 1640 media (Sigma Aldrich) supplemented with 10% foetal bovine serum (Scientifix)                                         | American Type Culture Collection                                           |

|                |                  |                                                                                                                                                             |                                                                            |
|----------------|------------------|-------------------------------------------------------------------------------------------------------------------------------------------------------------|----------------------------------------------------------------------------|
| Be(2)-M17      | Neuroblastoma    | Ham's F12/ EMEM media (both Sigma Aldrich) supplemented with 1% NEAA (Life Technologies), 2 mM L-glutamine (Gibco) and 15% foetal bovine serum (Scientifix) | CellBank Australia, the European Collection of Cell Cultures               |
| Kelly          | Neuroblastoma    | RPMI 1640 media (Sigma Aldrich) supplemented with 2mM L- glutamine (Gibco) and 10% foetal bovine serum (Scientifix)                                         | CellBank Australia, the European Collection of Cell Cultures               |
| SH-SY-5Y       | Neuroblastoma    | Ham's F12 / EMEM (ATCC) media supplemented with 1% NEAA (Life Technologies), 2 mM L-glutamine (Gibco) and 15% foetal bovine serum (Scientifix)              | CellBank Australia, the European Collection of Cell Cultures               |
| SK-N-DZ        | Neuroblastoma    | DMEM media (Sigma Aldrich) supplemented with 2 mM L- glutamine (Gibco), 20% foetal bovine serum (Scientifix) and 1% NEAA (Sigma Aldrich)                    | CellBank Australia, the European Collection of Cell Cultures               |
| OVCAR3-Luc     | Ovarian          | RPMI 1640 media (Sigma Aldrich) supplemented with 15U Insulin (Protaphone), 20% foetal bovine serum (Scientifix)                                            | CellBank Australia, Japanese Collection of Research Bioresources Cell Bank |
| OVCAR5         | Ovarian          | RPMI 1640 media (Sigma Aldrich) supplemented with 2 mM L- glutamine (Gibco) and 10% foetal bovine serum (Scientifix)                                        | Dr Thomas Hamilton (Fox Chase Cancer Center, PA, USA)                      |
| AsPC-1/CMV-Luc | Pancreatic       | RPMI 1640 media (Sigma Aldrich) supplemented with 10% foetal bovine serum (Scientifix)                                                                      | CellBank Australia, Japanese Collection of Research Bioresources Cell Bank |
| PC3-Luc        | Prostate         | Ham's F12 media supplemented with 7% foetal bovine serum (Scientifix)                                                                                       | CellBank Australia, the European Collection of Cell Cultures               |
| DU-145-luc     | Prostate         | EMEM media (Sigma Aldrich) supplemented with 10% foetal bovine serum (Scientifix)                                                                           | CellBank Australia, Japanese Collection of Research Bioresources Cell Bank |
| RPMI-8226      | Myeloma          | RPMI 1640 media (Sigma Aldrich) supplemented with 10% foetal bovine serum (Scientifix)                                                                      | Kindly provided by Dr Krzysztof Mrozik, University of Adelaide             |
| RD             | Rhabdomyosarcoma | DMEM media (Sigma Aldrich) supplemented with 2 mM L- glutamine (Gibco), 10% foetal bovine serum (Scientifix), 2%                                            | CellBank Australia, the European Collection of Cell Cultures               |

|  |  |                                                     |  |
|--|--|-----------------------------------------------------|--|
|  |  | NEAA (Life Technologies) and<br>2% Vitamins (Gibco) |  |
|--|--|-----------------------------------------------------|--|

**Supplementary Table 2 Monoclonal antibodies and related reagents**

| Primary antibodies for flow cytometry and cell culture |                                          |                      |                            |                                                                                |                   |
|--------------------------------------------------------|------------------------------------------|----------------------|----------------------------|--------------------------------------------------------------------------------|-------------------|
| Antigen                                                | Conjugate                                | Clone                | Manufacturer/Cat<br>.No.   | Final<br>concentratio<br>n or dilution<br>from<br>manufacturer<br>'s test size | Final<br>dilution |
| CD3                                                    | BUV737<br><br>Purified (cell<br>culture) | UCHT1<br><br>OKT3    | BD<br><br>/612750          | 30ng/ml<br><br>1/8                                                             | 1:250             |
| CD4                                                    | BUV496                                   | SK3                  | BD/612936                  | 1/4                                                                            | 1:200             |
| CD8                                                    | BUV395                                   | RPA-T8               | BD/563795                  | 1/8                                                                            | 1:250             |
| Granzyme<br>B                                          | BV421                                    | GB11                 | BD/563389                  | 1/2                                                                            | 1:100             |
| Perforin                                               | FITC                                     | B-D48                | Biolegend/35331<br>0       | 1/4                                                                            | 1:200             |
| CD107a                                                 | PECy7                                    | H4A3                 | BD/561348                  | 1/6                                                                            | 1:300             |
| IFN $\gamma$                                           | PE                                       | B27                  | BD/559327                  | Recommend<br>ed                                                                | 1:12.5            |
| TNF $\alpha$                                           | APC                                      | MAb11                | BD/554514                  | 1/2                                                                            | 1:200             |
| IL-2                                                   | BV711                                    | 5344.111             | BD/563946                  | 1/4                                                                            | 1:50              |
| CCR7                                                   | PE                                       | 150503<br><br>2-L1-A | BD/560765<br><br>BD/566741 | Recommend<br>ed<br><br>Recommend<br>ed                                         | 1:12.5            |
| CD45RA                                                 | BB515                                    | HI100                | BD/564552                  | 1/6                                                                            | 1:250             |
| CD45RO                                                 | PECy7                                    | UCHL1                | BD/337168                  | Recommend<br>ed                                                                | 1:50              |
| CD62L                                                  | BV421                                    | DREG-56              | BD/563862                  | 1/2                                                                            | 1:15              |
| EGFR                                                   | eF660                                    | me1B3                | Invitrogen/50-<br>9509-42  | Recommend<br>ed                                                                | 1:50              |

|                                        |                    |           |              |                |        |
|----------------------------------------|--------------------|-----------|--------------|----------------|--------|
| CD27                                   | APC                | M-T271    | BD/558664    | Recommended    | 1:25   |
| CD28                                   | BUV737             | CD28.2    | BD/612815    | Recommended    | 1:50   |
| CD95                                   | PECy7              | DX2       | BD/561633    | 1/8            | 1:200  |
| CXCR3                                  | BV421              | 1C6/CXCR3 | BD/562558    | Recommended    | 1:50   |
| PD-1                                   | PECy7              | EH12.1    | BD/561272    | Recommended    | 1:50   |
| CTLA-4                                 | BV421              | BNI3      | BD/562743    | Recommended    | 1:50   |
| TIM-3                                  | BB515              | 7D3       | BD/565588    | Recommended    | 1:50   |
| LAG-3                                  | AF-647             | T47-530   | BD/565716    | Recommended    | 1:50   |
| CD39                                   | PE-CF594<br>BUV805 | TU66      | BD/563678    | Recommended    | 1:50   |
| IgG2a isotype                          | BV421              | G155-178  | BD           | 1/10           |        |
| <b>Related flow cytometry reagents</b> |                    |           |              |                |        |
| Reagent                                | Conjugate          | Clone     | Manufacturer | Final dilution |        |
| Fixable Viability Dye                  | 780                | -         | BD/565388    | 1/1000         | 1:1000 |
| NfP2X7 Peptide Mimetic                 | Biotin             | -         | GenScript    | 400nM          |        |
| Streptavidin                           | BV421              | 0.5µg/ml  | BD           | 1:200          |        |
